# Supplementary material for: Intraspecies Signaling between Common Variants of Pseudomonas aeruginosa Increases Production of Quorum-Sensing-Controlled Virulence Factors
Source: PubMed Central journal article supplement (PMC7448281; doi:10.1128/mbio.01865-20), 2020-08-25

WT

 $\Delta anr$  $\Delta lasR$  $\Delta lasR\Delta anr$ Mono-  
culture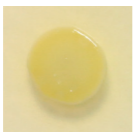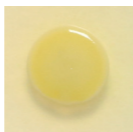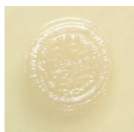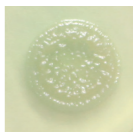 $\Delta anr$  $\Delta anr$ 

WT

 $\Delta lasR\Delta anr$  $\Delta lasR$  $\Delta lasR\Delta anr$ Co-  
culture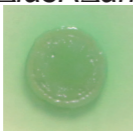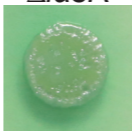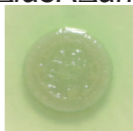

Supplement: mBio.01865-20-sf002.pdf [file mBio.01865-20-sf002.pdf]
