# Supplementary material for: Intraspecies Signaling between Common Variants of Pseudomonas aeruginosa Increases Production of Quorum-Sensing-Controlled Virulence Factors
Source: PubMed Central journal article supplement (PMC7448281; doi:10.1128/mbio.01865-20), 2020-08-25

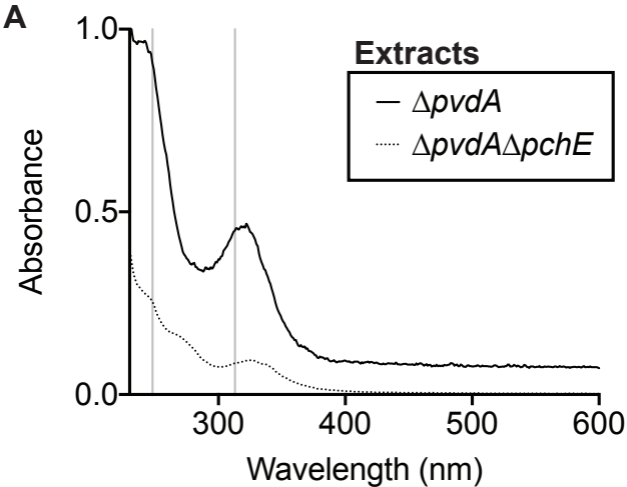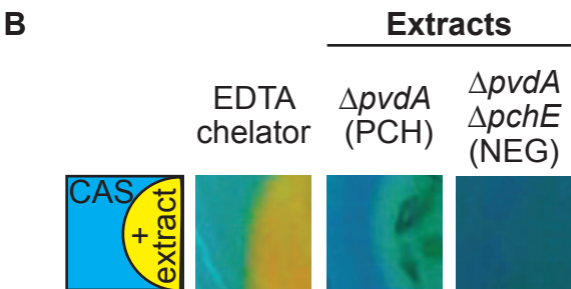

Supplement: mBio.01865-20-sf006.pdf [file mBio.01865-20-sf006.pdf]
